# Supplementary material for: Functional Antagonism of Junctional Adhesion Molecule-A (JAM-A), Overexpressed in Breast Ductal Carcinoma In Situ (DCIS), Reduces HER2-Positive Tumor Progression
Source: MDPI journal article supplement (doi:10.3390/cancers14051303), 2022-03-03
Supplement: s1 [file s1]

**Supplemental Table S1: Antibodies used for reverse phase protein array proteomic study**

|               |                |
|---------------|----------------|
| AKT           | Mcl1           |
| AKT(S473)     | MEK1           |
| AKT(T308)     | MEK1_2(S217)   |
| Akt2          | MET            |
| AMPK(T172)    | MET(T1234)     |
| AMPKalpha     | mTOR           |
| bak           | mTOR(S2448)    |
| Bax           | NF_kB_p65      |
| Bcl-xl        | p27            |
| Casp7_cleaved | p27(T157)      |
| CASP9(D315)   | p38MAPK        |
| CASPASE8      | p38MAPK(T180)  |
| CHK1          | p53            |
| CHK1(S345)    | PDK1           |
| cRAF          | PDK1(S241)     |
| cRAF(S338)    | PI3KalPha      |
| EGFR          | PKCalpha       |
| FAK           | PKCalpha(S657) |
| FAK(Y925)     | PTEN           |
| gab1(Y627)    | S6RIB(S235)    |
| GSK3B         | S6RIB(S240)    |
| GSK3B(S9)     | SMAC           |
| HER2          | SRC            |
| HIAP2         | SRC(Y527)      |
| IGFIR-beta    | STAT3          |
| LHDA          | TIGAR          |
| MAPK          | VEFGR-2        |
| MAPK(T202)    |                |

**Supplemental Table S2: Antibodies used for O-Link multiplex array proteomic study**

|            |               |           |
|------------|---------------|-----------|
| 5'-NT      | FGF-BP1       | PPY       |
| ABL1       | FR-alpha      | PVRL4     |
| ADAM 8     | FR-gamma      | RET       |
| ADAM-TS 15 | FURIN         | RSPO3     |
| ANXA1      | Gal-1         | S100A11   |
| AREG       | GPC1          | S100A4    |
| CAIX       | GPNMB         | SCAMP3    |
| CD160      | GZMB          | SCF       |
| CD207      | GZMH          | SEZ6L     |
| CD27       | HGF           | SPARC     |
| CD48       | hK11          | SYND1     |
| CD70       | hK14          | TCL1A     |
| CDKN1A     | hK8           | TFPI-2    |
| CEACAM1    | ICOSLG        | TGF-alpha |
| CEACAM5    | IFN-gamma-R1  | TGFR-2    |
| CPE        | IGF1R         | TLR3      |
| CRNN       | IL6           | TNFRSF19  |
| CTSV       | ITGAV         | TNFRSF4   |
| CXCL13     | ITGB5         | TNFRSF6B  |
| CXL17      | KLK13         | TNFSF13   |
| CYR61      | LY9           | TRAIL     |
| DLL1       | LYN           | TXLNA     |
| EGF        | LYPD3         | VEGFA     |
| EPHA2      | MAD homolog 5 | VEGFR-2   |
| ERBB2      | MetAP 2       | VEGFR-3   |
| ERBB3      | MIA           | VIM       |
| ERBB4      | MIC-A/B       | WFDC2     |
| ESM-1      | MK            | WIF-1     |
| FADD       | MSLN          | WISP-1    |
| FASLG      | MUC-16        | XPNPEP2   |
| FCRLB      | PODXL         |           |
